# Supplementary material
Source: publisher figshare collection journal article supplement (https://acs.figshare.com/ndownloader/files/33133902)
Supplement: Supplementary file 1 [file 33133902]

## Supporting Information

### Atomic-scale understanding of Li storage processes in the $\text{Ti}_4\text{C}_3$ and chemically-ordered $\text{Ti}_2\text{Ta}_2\text{C}_3$ MXenes: a theoretical and experimental assessment

*Daniel Maldonado-Lopez<sup>a,b</sup>, Jassiel R. Rodriguez<sup>c,d</sup>, Vilas G. Pol<sup>d</sup>, Ravuri Syamsa<sup>e</sup>, Andrews*

*Nirmala Grace<sup>e</sup>, S. J. Gutiérrez-Ojeda<sup>b</sup>, Rodrigo Ponce-Pérez<sup>b,\*</sup>, Ma. Guadalupe Moreno-*

*Armenta<sup>b,\*</sup>, Jonathan Guerrero-Sánchez<sup>b</sup>*

<sup>a</sup> Department of Chemical Engineering & Materials Science, Michigan state University, East Lansing, MI 48823

<sup>b</sup> Centro de Nanociencias y Nanotecnología, Universidad Nacional Autónoma de México, 22800, Ensenada, Baja California, México

<sup>c</sup> Centro de Investigación Científica y de Educación Superior de Ensenada, Ensenada, BC 22860, Mex.

<sup>d</sup> Davidson School of Chemical Engineering, Purdue University, West Lafayette, IN 47907, USA

<sup>e</sup> Center for Nanotechnology Research, Vellore Institute of Technology (VIT), Vellore - 632014, Tamil Nadu, India

\*E-mail: [rponce@ens.cnyn.unam.mx](mailto:rponce@ens.cnyn.unam.mx) (R. Ponce-Pérez) and [moreno@ens.cnyn.unam.mx](mailto:moreno@ens.cnyn.unam.mx) (M.

G. Moreno-Armenta)



Defect Formation Energy formalism is employed to investigate the thermodynamic stability of the  $\text{Ti}_x\text{Ta}_{4-x}\text{C}_3$  MXenes. The 3D plot is shown in **Figure S1**, where each plane represents a different MXene. According to our formalism, the most stable structures exhibit the lowest energy values.

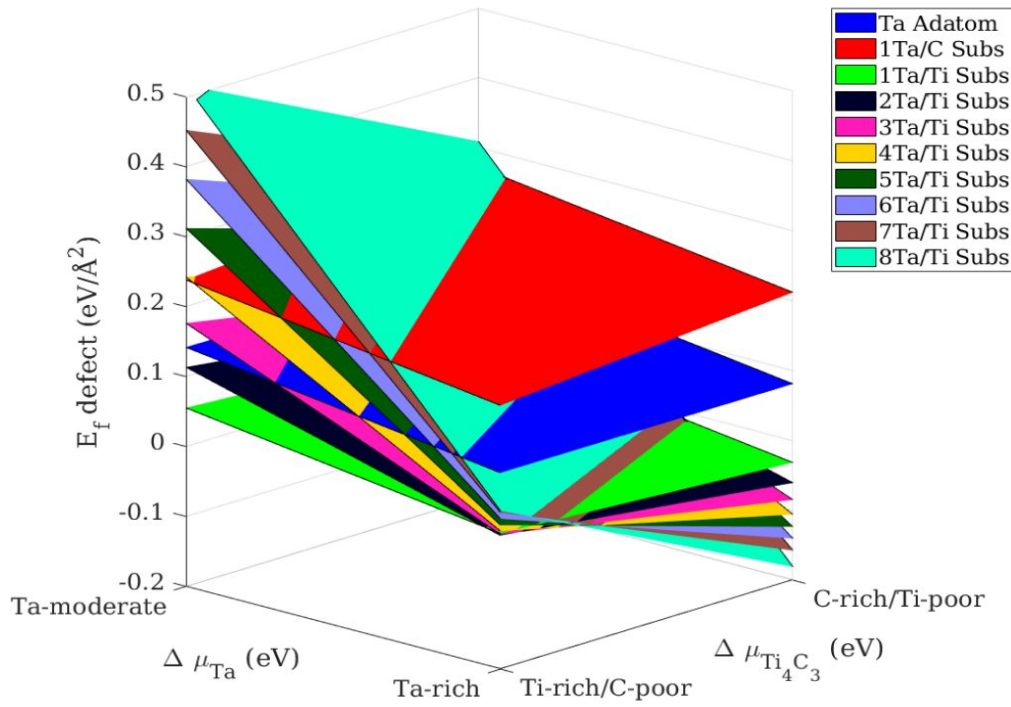

**Figure S1.** 3D Defect Formation Energy plot.

### Same stoichiometry Ta defect analysis

Since Ta defects can be placed in different positions, it is necessary to evaluate which of these sites is more energetically favorable for the MXene. To measure the most stable sites for each defect, we directly compare the DFT total energy, since stoichiometry remains the same

because we are only changing the position and not the number of atoms. In Table S1, we present the relative energies for different Ta-incorporated  $\text{Ti}_4\text{C}_3$  structures. Each segment of the table represents a different defect, and each column is a different atomic arrangement. For notation purposes, we use “in” to indicate that the defect is located in an inner layer, “out” to indicate that the defect is located in an outer layer. We also use “different layer” or “same layer” when we have more than one defect.

**Table S1.** Relative energies in Ta-incorporated structures with the same stoichiometry. In each case, the structure with the lowest energy value is the energy reference.

|                             |         |              |        |                 |            |
|-----------------------------|---------|--------------|--------|-----------------|------------|
| <b>1 Ta Adatom</b>          |         | Bridge       | Hollow | T4              | Top        |
| Relative energy (eV)        |         | 0.00         | 0.03   | 0.01            | 0.63       |
| <b>1 Ta/C Substitution</b>  |         | Out          |        | In              |            |
| Relative energy (eV)        |         | 0.00         |        | 1.82            |            |
| <b>1 Ti/Ta Substitution</b> |         | Out          |        | In              |            |
| Relative energy (eV)        |         | 0.00         |        | 0.54            |            |
| <b>2 Ti/Ta</b>              | out/out | out/out same | out/in | in/in dif layer | in/in same |

| Substitution | different layer | layer |      |      | layer |
|--------------|-----------------|-------|------|------|-------|
| Relative     |                 |       |      |      |       |
| energy (eV)  | 0.98            | 0.99  | 0.51 | 0.00 | 0.05  |

---

| 8Ti/Ta Substitution  | mixed | separate | chemically ordered |
|----------------------|-------|----------|--------------------|
| Relative energy (eV) | 0.88  | 0.83     | 0.00               |

---

The atomistic models of the five most stable systems, according to the DFE formalism are displayed in **Figure S2**. In all cases, the Ta atoms occupies the Ti sites of the middle layers.

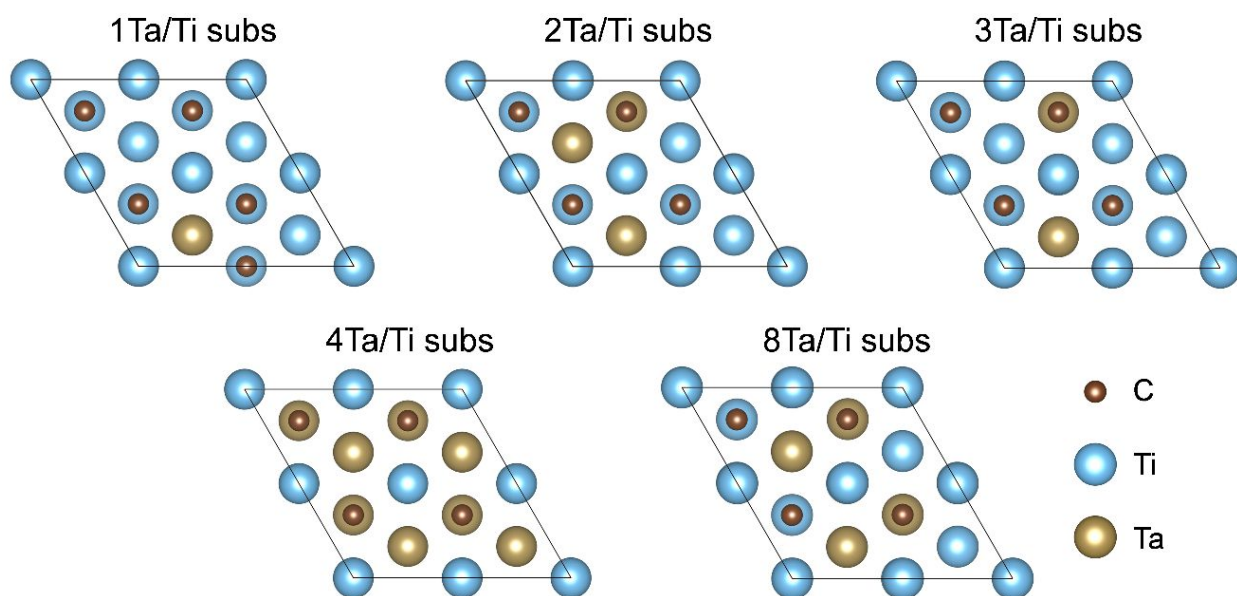

**Figure S2.** Atomic models for the five most stable MXenes according to the DFE formalism.

The atomic representation of the synthesized  $\text{Ti}_2\text{Ta}_2\text{C}_3$  MXenes in their out-of-plane chemically-ordered atomic arrangement, which results to be the most stable configuration is displayed in **Figure S3**.

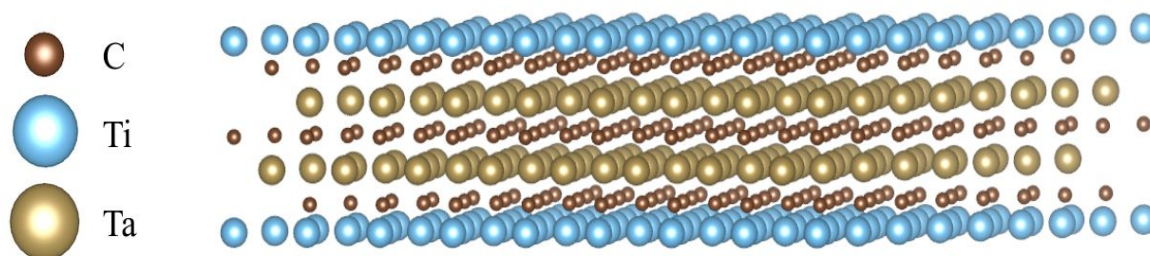

**Figure S3.**  $\text{Ti}_2\text{Ta}_2\text{C}_3$  MXene in its chemically-ordered arrangement.

For clarity, the mixed, separate, and chemically ordered 8Ti/Ta structures are shown in **Figure S4**.

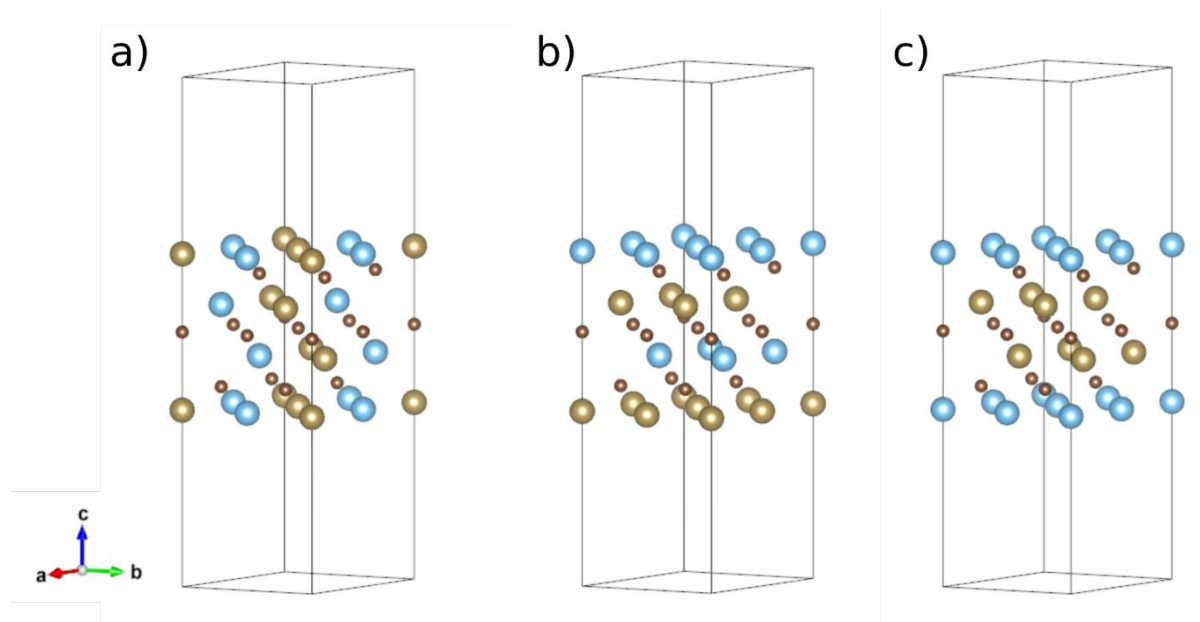

**Figure S4.** Different structural arrangements for the 8Ti/Ta  $\text{Ti}_4\text{C}_3$  MXene defect structure. a) mixed, b) separate, c) chemically ordered.

Four different high symmetry sites have been considered to investigate the adsorption of Li on top of the MXene: the T4 configuration occurs when the Li is placed on top of one C atom of the 2<sup>nd</sup> monolayer; Hollow site is on top of the Ti (Ta) atom of the 3<sup>rd</sup> monolayer; Bridge site is the middle point between two Ti atoms of the 1<sup>st</sup> layer, and, Top site is when the Li is on

top of a Ti atom of the 1<sup>st</sup> monolayer. The atomic representations of the different high symmetry sites are depicted in **Figure S5**.

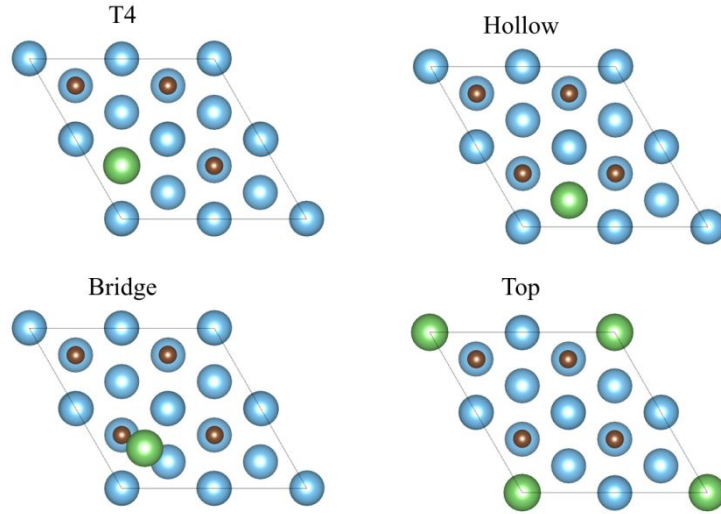

**Figure S5.** Four high-symmetry Li-atom positions on Ti<sub>4</sub>C<sub>3</sub> considered in this work.

The OCV as a function of the Li concentration graph, considering the Li intercalation process in the two sides of the MXene is shown in **figure S6**, we observe a similar behavior in comparison with the one side Li intercalation process, the  $y_{max}$  for the pristine and chemical ordered alloy are 2.59 and 2.63, respectively.



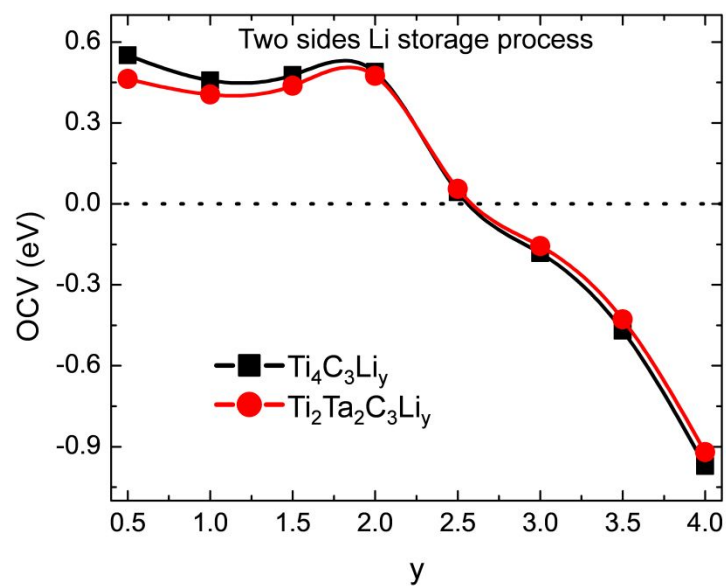

**Figure S6.** OCV in function of Li content, considering the case when the Li storage occurs in the two sides of the MXene.
